# Supplementary material for: Li-Free ternary sulphide Cs5Ga9S16 with excellent nonlinear optical performance similar to classic LiGaS2
Source: Royal Society of Chemistry journal article supplement (doi:10.1039/d2qi01074g), 2022-01-01
Supplement: d2qi01074g1.pdf [file d2qi01074g1.pdf]

Support information

**Li-free Ternary Sulphide Cs<sub>5</sub>Ga<sub>9</sub>S<sub>16</sub> with Excellent Nonlinear Optical  
Performance Similar to Classic LiGaS<sub>2</sub>**

*Jin-Xu Zhao,<sup>a,c</sup> Xiao-Ming Jiang,<sup>a</sup> Wen-Fa Chen,<sup>a</sup> Shao-Min Pei,<sup>a</sup> Bin-Wen Liu,<sup>\*,a,b</sup>  
and Guo-Cong Guo<sup>\*,a,b,c</sup>*

*a.* State Key Laboratory of Structural Chemistry, Fujian Institute of Research on the Structure of Matter, Chinese Academy of Sciences, Fuzhou, Fujian 350002, People's Republic of China

*b.* Fujian Science & Technology Innovation Laboratory for Optoelectronic Information of China, Fuzhou, Fujian, 350108, People's Republic of China

*c.* School of Physical Science and Technology, Shanghai Tech University, Shanghai 201210, People's Republic of China

## Table of Contents

|                                                                                                                                                                          |    |
|--------------------------------------------------------------------------------------------------------------------------------------------------------------------------|----|
| <b>Figure S1.</b> EDS of single-crystal of Cs <sub>5</sub> Ga <sub>9</sub> S <sub>16</sub> .....                                                                         | S3 |
| <b>Figure S2.</b> IR spectrum of Cs <sub>5</sub> Ga <sub>9</sub> S <sub>16</sub> .....                                                                                   | S3 |
| <b>Figure S3.</b> Electronic band structure of Cs <sub>5</sub> Ga <sub>9</sub> S <sub>16</sub> .....                                                                     | S3 |
| <b>Table S1.</b> Crystallographic data and structure refinement results of Cs <sub>5</sub> Ga <sub>9</sub> S <sub>16</sub> .....                                         | S4 |
| <b>Table S2.</b> Atomic coordinates, equivalent isotropic displacement parameters of<br>Cs <sub>5</sub> Ga <sub>9</sub> S <sub>16</sub> .....                            | S4 |
| <b>Table S3.</b> Selected bond distances for Cs <sub>5</sub> Ga <sub>9</sub> S <sub>16</sub> .....                                                                       | S5 |
| <b>Table S4.</b> Selected bond angles for Cs <sub>5</sub> Ga <sub>9</sub> S <sub>16</sub> .....                                                                          | S6 |
| <b>Table S5.</b> The laser-induced damage thresholds of Cs <sub>5</sub> Ga <sub>9</sub> S <sub>16</sub> , LiGaS <sub>2</sub> , and<br>benchmark AgGaS <sub>2</sub> ..... | S7 |

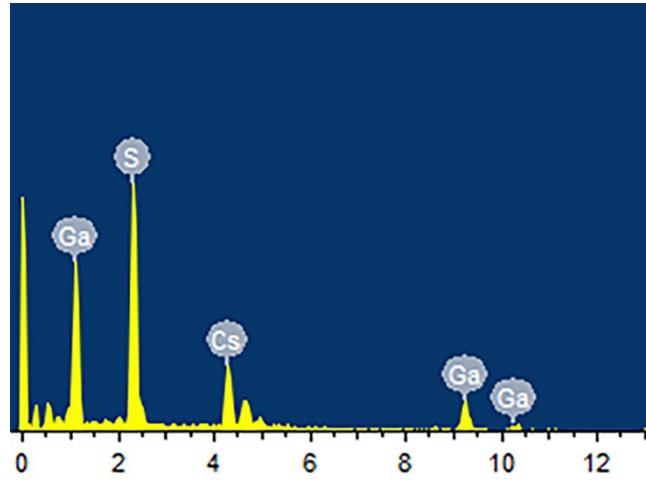

**Fig. S1** EDS of single-crystal of  $\text{Cs}_5\text{Ga}_9\text{S}_{16}$ .

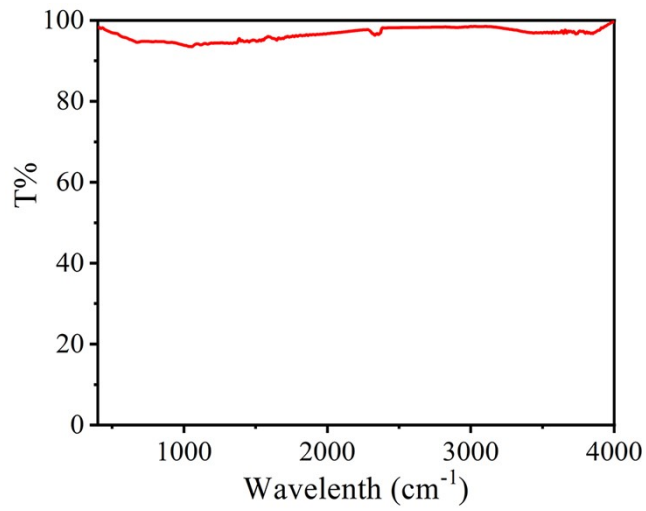

**Fig. S2** IR spectrum of  $\text{Cs}_5\text{Ga}_9\text{S}_{16}$ .

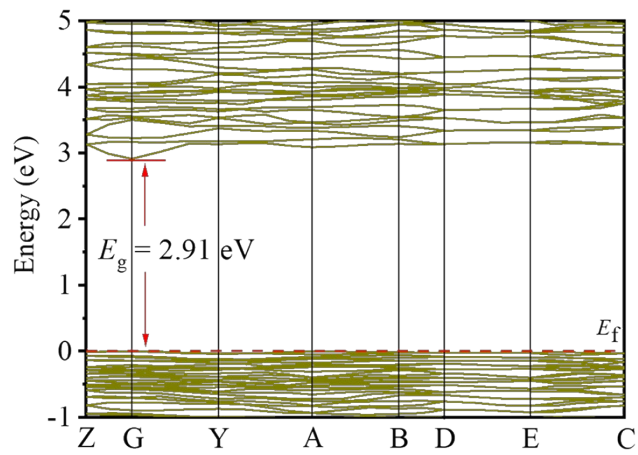

**Fig. S3** Electronic band structure of  $\text{Cs}_5\text{Ga}_9\text{S}_{16}$ .

**Table S1.** Crystallographic data and structure refinement results of Cs<sub>5</sub>Ga<sub>9</sub>S<sub>16</sub>.

|                                                                                                                                                                                                                                                                                                                                               |                                                 |
|-----------------------------------------------------------------------------------------------------------------------------------------------------------------------------------------------------------------------------------------------------------------------------------------------------------------------------------------------|-------------------------------------------------|
| Empirical formula                                                                                                                                                                                                                                                                                                                             | Cs <sub>5</sub> Ga <sub>9</sub> S <sub>16</sub> |
| Fw                                                                                                                                                                                                                                                                                                                                            | 1805.15                                         |
| Temperature (K)                                                                                                                                                                                                                                                                                                                               | 293(2)                                          |
| Space group                                                                                                                                                                                                                                                                                                                                   | <i>Pc</i>                                       |
| <i>a</i> (Å)                                                                                                                                                                                                                                                                                                                                  | 9.4067(11)                                      |
| <i>b</i> (Å)                                                                                                                                                                                                                                                                                                                                  | 9.6983(11)                                      |
| <i>c</i> (Å)                                                                                                                                                                                                                                                                                                                                  | 19.3949(18)                                     |
| $\alpha$ (°)                                                                                                                                                                                                                                                                                                                                  | 90.00                                           |
| $\beta$ (°)                                                                                                                                                                                                                                                                                                                                   | 107.912(5)                                      |
| $\gamma$ (°)                                                                                                                                                                                                                                                                                                                                  | 90.00                                           |
| Volume (Å <sup>3</sup> )                                                                                                                                                                                                                                                                                                                      | 1683.6(3)                                       |
| <i>Z</i>                                                                                                                                                                                                                                                                                                                                      | 2                                               |
| $\rho_{\text{calcd}}$ (g cm <sup>-3</sup> )                                                                                                                                                                                                                                                                                                   | 3.561                                           |
| $\mu$ (mm <sup>-1</sup> )                                                                                                                                                                                                                                                                                                                     | 13.401                                          |
| GOF on <i>F</i> <sup>2</sup>                                                                                                                                                                                                                                                                                                                  | 1.040                                           |
| <i>R</i> <sub>1</sub> <sup><i>a</i></sup> [ <i>I</i> ≥ 2σ( <i>I</i> )]                                                                                                                                                                                                                                                                        | 0.0289                                          |
| <i>wR</i> <sub>2</sub> <sup><i>b</i></sup> [ <i>I</i> ≥ 2σ( <i>I</i> )]                                                                                                                                                                                                                                                                       | 0.0606                                          |
| <i>R</i> <sub>1</sub> <sup><i>a</i></sup> [all data]                                                                                                                                                                                                                                                                                          | 0.0301                                          |
| <i>wR</i> <sub>2</sub> <sup><i>b</i></sup> [all data]                                                                                                                                                                                                                                                                                         | 0.0616                                          |
| <i>Dr</i> <sub>max</sub> / <i>Dr</i> <sub>min</sub> (e Å <sup>-3</sup> )                                                                                                                                                                                                                                                                      | 1.01/-1.12                                      |
| Flack                                                                                                                                                                                                                                                                                                                                         | -0.017(11)                                      |
| <sup><i>a</i></sup> <i>R</i> = Σ   <i>F</i> <sub>o</sub>   -   <i>F</i> <sub>c</sub>   /Σ  <i>F</i> <sub>o</sub>  , <sup><i>b</i></sup> <i>wR</i> = (Σ( <i>w</i> ( <i>F</i> <sub>o</sub> <sup>2</sup> - <i>F</i> <sub>c</sub> <sup>2</sup> ) <sup>2</sup> )/Σ( <i>w</i> ( <i>F</i> <sub>o</sub> <sup>2</sup> ) <sup>2</sup> )) <sup>1/2</sup> |                                                 |

**Table 2.** Atomic coordinates, equivalent isotropic displacement parameters (Å<sup>2</sup>) of Cs<sub>5</sub>Ga<sub>9</sub>S<sub>16</sub>.

| Atom | <i>x</i>   | <i>y</i>  | <i>Z</i>  | <i>U</i> <sub>(eq)</sub> |
|------|------------|-----------|-----------|--------------------------|
| Cs1  | 10004.8(6) | 9158.9(6) | 9999.0(3) | 25.40(14)                |
| Cs2  | 7021.2(7)  | 8973.3(6) | 2654.0(3) | 29.93(15)                |
| Cs3  | 5289.2(7)  | 9019.3(6) | 5229.8(3) | 30.31(15)                |
| Cs4  | 3783.7(7)  | 4307.2(6) | 6357.7(4) | 31.59(15)                |
| Cs5  | 1115.4(6)  | 4437.9(7) | 8759.5(3) | 29.93(15)                |
| Ga1  | 9679.8(9)  | 7823.2(9) | 7242.7(4) | 12.35(18)                |
| Ga2  | 9558.7(9)  | 6813.5(9) | 5443.2(5) | 13.52(19)                |
| Ga3  | 8728.6(9)  | 3994.0(9) | 6101.8(5) | 13.14(19)                |
| Ga4  | 7012.0(10) | 4253.5(9) | 9208.7(5) | 14.74(19)                |

| Atom | <i>x</i>  | <i>y</i>  | <i>Z</i>   | <i>U</i> <sub>(eq)</sub> |
|------|-----------|-----------|------------|--------------------------|
| Ga5  | 6694.2(9) | 6991.9(9) | 7996.1(4)  | 12.81(18)                |
| Ga6  | 5289.3(9) | 6832.7(9) | 9766.0(5)  | 13.67(19)                |
| Ga7  | 3162.6(9) | 8636.4(9) | 8546.5(5)  | 14.44(19)                |
| Ga8  | 3101.0(9) | 8321.2(9) | 6706.5(5)  | 12.54(18)                |
| Ga9  | 1298.3(9) | 8913.7(9) | 2175.5(5)  | 14.78(19)                |
| S1   | 9240(2)   | 9793(2)   | 6618.3(11) | 17.5(4)                  |
| S2   | 9151(2)   | 5496(2)   | 9990.8(11) | 14.5(4)                  |
| S3   | 9103(2)   | 7735(2)   | 8276.6(11) | 18.1(4)                  |
| S4   | 8406(2)   | 6366(2)   | 6305.0(11) | 13.5(4)                  |
| S5   | 8010(2)   | 7891(2)   | 4465.2(11) | 18.4(4)                  |
| S6   | 6767(2)   | 2580(2)   | 5883.9(11) | 19.1(4)                  |
| S7   | 6710(3)   | 4672(2)   | 8045.2(12) | 24.3(5)                  |
| S8   | 5815(2)   | 8180(2)   | 8849.8(10) | 14.3(4)                  |
| S9   | 5475(2)   | 7659(2)   | 6866.8(11) | 17.0(4)                  |
| S10  | 5027(2)   | 4564(2)   | 9587.4(13) | 22.1(5)                  |
| S11  | 3106(2)   | 9365(2)   | 1659.8(13) | 21.5(5)                  |
| S12  | 3011(2)   | 7781(2)   | 9600.3(11) | 18.0(4)                  |
| S13  | 2276(3)   | 9210(2)   | 3397.9(12) | 29.1(6)                  |
| S14  | 2213(2)   | 7215(2)   | 7559.5(10) | 13.2(4)                  |
| S15  | 1915(2)   | 7395(2)   | 5599.8(11) | 19.3(4)                  |
| S16  | 760(2)    | 3390(2)   | 7000.8(11) | 18.9(4)                  |

**Table S3.** Selected bond distances (Å) for Cs<sub>5</sub>Ga<sub>9</sub>S<sub>16</sub>.

| Bond    | Length   | Bond    | Length   |
|---------|----------|---------|----------|
| Ga1-S1  | 2.231(2) | Ga7-S8  | 2.421(2) |
| Ga1-S3  | 2.234(2) | Ga7-S12 | 2.251(2) |
| Ga1-S4  | 2.324(2) | Ga7-S13 | 2.234(2) |
| Ga1-S14 | 2.346(2) | Ga7-S14 | 2.305(2) |
| Ga2-S2  | 2.393(2) | Ga8-S9  | 2.252(2) |
| Ga2-S4  | 2.296(2) | Ga8-S11 | 2.246(2) |
| Ga2-S5  | 2.261(2) | Ga8-S14 | 2.331(2) |
| Ga2-S15 | 2.216(2) | Ga8-S15 | 2.277(2) |
| Ga3-S2  | 2.361(2) | Ga9-S1  | 2.281(2) |
| Ga3-S4  | 2.369(2) | Ga9-S11 | 2.265(2) |
| Ga3-S6  | 2.232(2) | Ga9-S13 | 2.282(2) |
| Ga3-S16 | 2.233(2) | Ga9-S16 | 2.293(2) |
| Ga4-S2  | 2.434(2) | S1-Ga9  | 2.281(2) |
| Ga4-S5  | 2.274(2) | S2-Ga2  | 2.393(2) |
| Ga4-S7  | 2.223(2) | S2-Ga3  | 2.361(2) |

|         |          |         |            |
|---------|----------|---------|------------|
| Ga4-S10 | 2.227(2) | S5-Ga4  | 2.274(2)   |
| Ga5-S3  | 2.279(2) | S6-Ga6  | 2.259(2)   |
| Ga5-S7  | 2.252(2) | S11-Ga8 | 2.246(2)   |
| Ga5-S8  | 2.366(2) | S13-Ga7 | 2.234(2)   |
| Ga5-S9  | 2.233(2) | S14-Ga1 | 2.3460(19) |
| Ga6-S6  | 2.259(2) | S15-Ga2 | 2.216(2)   |
| Ga6-S8  | 2.377(2) | S16-Ga3 | 2.233(2)   |
| Ga6-S10 | 2.229(2) | S16-Ga9 | 2.293(2)   |
| Ga6-S12 | 2.263(2) |         |            |

**Table S4.** Selected bond angles (°) for Cs<sub>5</sub>Ga<sub>9</sub>S<sub>16</sub>.

| ∠ Atom-Atom-Atom | Angle     | ∠ Atom-Atom-Atom | Angle      |
|------------------|-----------|------------------|------------|
| ∠S1-Ga1-S3       | 117.68(9) | ∠S9-Ga5-S3       | 108.40(8)  |
| ∠S1-Ga1-S4       | 97.54(8)  | ∠S9-Ga5-S7       | 109.00(9)  |
| ∠S1-Ga1-S14      | 111.17(8) | ∠S9-Ga5-S8       | 111.15(8)  |
| ∠S3-Ga1-S4-      | 118.04(8) | ∠S6-Ga6-S8       | 111.76(8)  |
| ∠S3-Ga1-S14      | 105.23(8) | ∠S6-Ga6-S12      | 108.07(8)  |
| ∠S4-Ga1-S14      | 106.83(7) | ∠S10-Ga6-S6      | 113.82(9)  |
| ∠S4-Ga2-S2       | 91.82(7)  | ∠S10-Ga6-S8      | 117.71(8)  |
| ∠S5-Ga2-S2       | 97.81(8)  | ∠S10-Ga6-S12     | 108.94(9)  |
| ∠S5-Ga2-S4       | 111.82(8) | ∠S12-Ga6-S8      | 94.36(8)   |
| ∠S15-Ga2-S2      | 109.22(8) | ∠S12-Ga7-S8      | 93.47(7)   |
| ∠S15-Ga2-S4      | 128.66(8) | ∠S12-Ga7-S14     | 114.66(9)  |
| ∠S15-Ga2-S5      | 110.88(9) | ∠S13-Ga7-S8      | 121.18(10) |
| ∠S2-Ga3-S4       | 90.82(7)  | ∠S13-Ga7-S12     | 109.65(9)  |
| ∠S6-Ga3-S2       | 108.51(8) | ∠S13-Ga7-S14     | 114.71(8)  |
| ∠S6-Ga3-S4       | 119.17(8) | ∠S14-Ga7-S8      | 101.52(7)  |
| ∠S6-Ga3-S16      | 116.47(8) | ∠S9-Ga8-S14      | 109.10(8)  |
| ∠S16-Ga3-S2      | 115.07(8) | ∠S9-Ga8-S15      | 101.26(8)  |
| ∠S16-Ga3-S4      | 104.33(8) | ∠S11-Ga8-S9      | 106.04(9)  |
| ∠S5-Ga4-S2       | 96.30(8)  | ∠S11-Ga8-S14     | 119.61(8)  |

| $\angle$ Atom-Atom-Atom | Angle      | $\angle$ Atom-Atom-Atom | Angle      |
|-------------------------|------------|-------------------------|------------|
| $\angle$ S7-Ga4-S2      | 111.42(9)  | $\angle$ S11-Ga8-S15    | 111.26(9)  |
| $\angle$ S7-Ga4-S5      | 107.72(9)  | $\angle$ S15-Ga8-S14    | 107.98(8)  |
| $\angle$ S7-Ga4-S10     | 116.85(10) | $\angle$ S1-Ga9-S13     | 115.80(9)  |
| $\angle$ S10-Ga4-S2     | 110.12(8)  | $\angle$ S1-Ga9-S16     | 110.44(8)  |
| $\angle$ S10-Ga4-S5     | 112.54(9)  | $\angle$ S11-Ga9-S1     | 109.13(9)  |
| $\angle$ S3-Ga5-S8      | 102.42(8)  | $\angle$ S11-Ga9-S13    | 108.47(10) |
| $\angle$ S7-Ga5-S3      | 108.22(9)  | $\angle$ S11-Ga9-S16    | 106.54(9)  |
| $\angle$ S7-Ga5-S8      | 117.15(8)  | $\angle$ S13-Ga9-S16    | 106.05(8)  |

**Table S5.** The laser-induced damage thresholds of  $\text{Cs}_5\text{Ga}_9\text{S}_{16}$ ,  $\text{LiGaS}_2$ , and benchmark  $\text{AgGaS}_2$ .

| Compounds                             | Damage energy (mJ) | Spot area ( $\text{cm}^2$ ) | $\tau_p$ (ns) | Damage threshold [ $\text{MW} \cdot \text{cm}^{-2}$ ] |
|---------------------------------------|--------------------|-----------------------------|---------------|-------------------------------------------------------|
| $\text{Cs}_5\text{Ga}_9\text{S}_{16}$ | 15.1               | 0.028                       | 10            | 53.3                                                  |
| $\text{LiGaS}_2$                      | 13.2               | 0.028                       | 10            | 46.6                                                  |
| $\text{AgGaS}_2$                      | 3.4                | 0.028                       | 10            | 12.0                                                  |
